# Supplementary material for: Coexpression and Transcriptome analyses identify active Apomixis-related genes in Paspalum notatum leaves
Source: PubMed Central journal article supplement (PMC6986084; doi:10.1186/s12864-020-6518-z), 2020-01-28

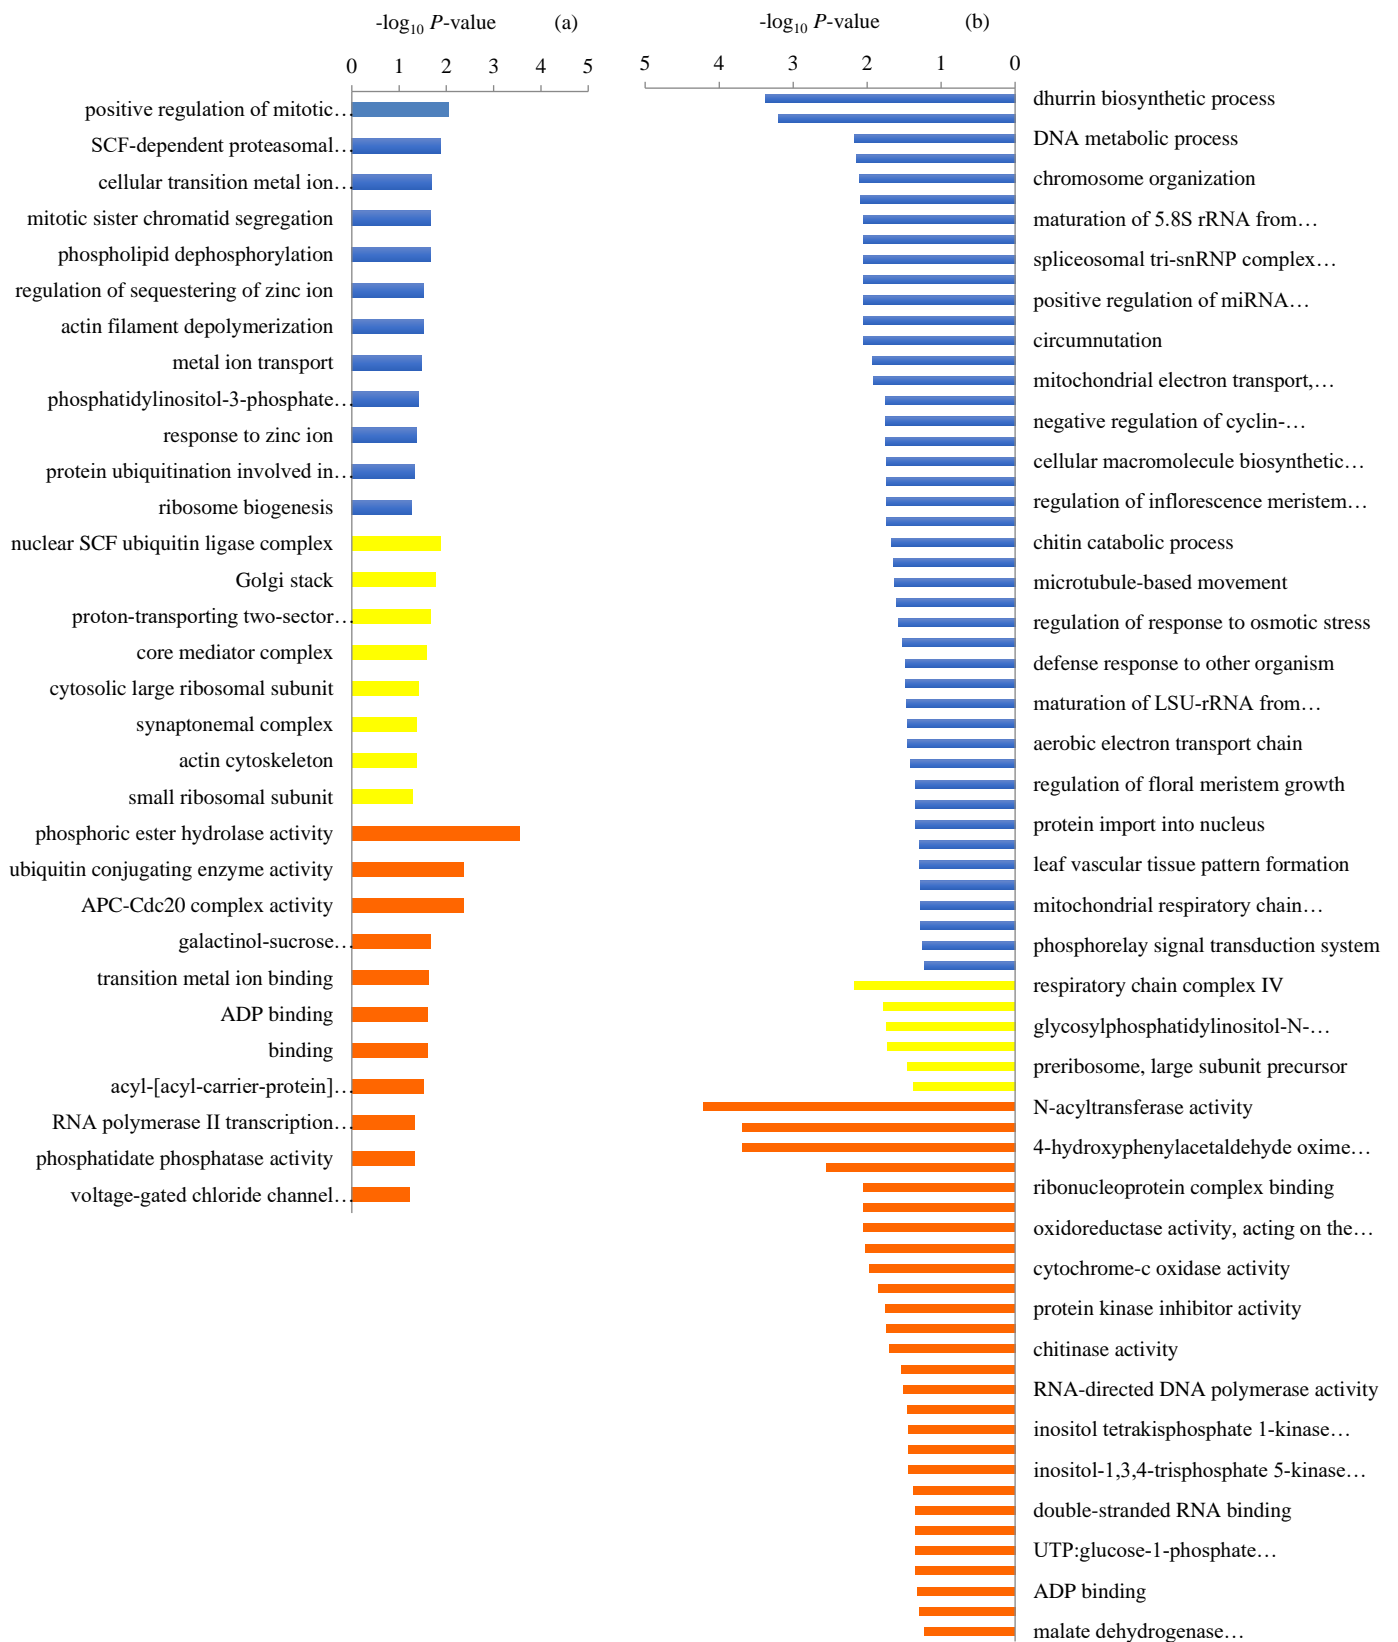

Supplement: 12864_2020_6518_MOESM5_ESM.pdf [file 12864_2020_6518_MOESM5_ESM.pdf]
